## 30 **Introduction**

31 The mammalian brain regulates conscious and subconscious states and empowers humans and  
32 animals with sensory, motor, memory and cognitive capabilities. These brain functions  
33 fundamentally rely on electrical activity of neurons, most importantly action potentials, and  
34 adaptable synaptic transmission between neurons, mediated by smaller excitatory and  
35 inhibitory postsynaptic currents. These cellular electrical signals propagate both along axons  
36 and through neuronal and glial tissue, and can be recorded both intra- and extracellularly by  
37 electrodes. Depending on the type of electrode and its relative position to the cellular source,  
38 such electrodes can record electrical signals in the form of spikes (corresponding to action  
39 potentials) or oscillatory slow-wave activity, local field potentials (LFPs). Since Hans  
40 Berger's first electroencephalogram (EEG) recordings in adult humans using extracranial  
41 scalp electrodes in 1929 (1), oscillatory slow-wave activity has been analyzed in traditional  
42 frequency bands like slow-oscillatory (< 1 Hz), delta (1—4 Hz), theta (4—11 Hz), beta (11—  
43 30 Hz), gamma (30—55 Hz) and high gamma (55—100 Hz). Sensorimotor function, speech,  
44 memory, perception, cognition and behavior—all brain information processing is  
45 accompanied by characteristic brain wave activity, reflected in the composition, power, and  
46 duration of neuronal local field potentials in these frequency bands.

47 Neuronal population activity and oscillatory slow-wave activity are not solely a hallmark of  
48 the adult brain, but already emerge and are detectable during fetal brain development. The  
49 first electroencephalograms of brain wave activity in full-term infants were published in 1938  
50 by Smith et al. in a series of articles (2-4), and the first measurement of brain wave activity in  
51 fetal human brain was published in 1942 by Lindsey(5), followed by research articles  
52 describing different brain wave activity during wakefulness and sleep in pre-term infants (6-  
53 9). Today, properties of oscillatory activity in developing fetal human brains between  
54 gestational week 24 and birth have been well described and classified (for review see (10,  
55 11)), while the early transition from immature human neurons into human neuronal circuits  
56 generating oscillatory brain activity has not yet been measured *in vivo*. Even though many  
57 different complex brain wave activity patterns emerge over time, the shift from smooth and  
58 slow brain waves with a low frequency (< 1 Hz) towards complex brain waves with higher  
59 frequency oscillatory activity (theta, beta) is a key hallmark of the functional mesoscale  
60 ontogeny of developing fetal human (for review see (10, 11)) and rodent postnatal neuronal  
61 circuits *in vivo* (12, 13).

62 Although rodent models have largely expanded our knowledge about how neuronal cells  
63 contribute to oscillatory slow-wave activity, these models lack human specific neural cell  
64 types (14, 15), limiting the translatability of results from animal models. Thus, human models  
65 are essential to better understand oscillatory activity generated from human neuronal  
66 populations. Human brain slice preparations from epileptogenic patients are suited to obtain  
67 insights into adult human neuronal circuit function (16, 17), but have very limited availability.

68 Moreover, the pathological origin of such brain tissue needs to be considered when  
69 interpreting the relevance of the data for healthy human neuron and brain function.

70 Human pluripotent stem-cell derived neural models recapitulate the principles of cellular and  
71 morphological ontogeny of human brain development (18). In cortical brain organoid models,  
72 predominant delta activity has been described between 2 and 4 months *in vitro* (19, 20).  
73 However, these studies revealed contradictory findings regarding whether delta activity  
74 appears spontaneously (19), can only be elicited by epileptogenic compounds (20), or requires  
75 a complex neural assembloid experimental paradigm (20). Moreover, the timeline for the  
76 detection of delta activity in human brain organoid models is lengthy; they do not permit  
77 speedy experiments, are costly and apparently reproducibility across different research groups  
78 is challenging. Up to now, a joint systematic assessment of oscillatory slow-wave activity and  
79 neuronal population activity has not been performed in human iPSC-neural models.

80 Using an *in vitro* human iPSC-based 3D neural aggregate (3DNA) model on microelectrode  
81 arrays (MEAs), we provide a comprehensive description of the functional ontogeny of  
82 oscillatory slow-wave activity together with neuronal population activity patterns in  
83 developing human cortical circuits and demonstrate that late-stage human iPSC-based cortical  
84 circuits reflect characteristics of mesoscale functionality occurring in deafferented adult  
85 human cortex.

86 Performing weekly recordings from the same 3DNA cultures for up to three months, we  
87 reveal distinct time windows where slow-oscillatory, delta, theta, beta and gamma oscillatory  
88 activity consecutively emerged. Our data show five consecutive functional stages, where each  
89 stage has specific oscillatory slow-wave activity and characteristic synchronous neuronal  
90 bursting patterns. Our findings are repeatedly observed across different experiments and  
91 across different human iPSC-lines confirming a conserved functional ontogeny of human  
92 iPSC-derived neuronal circuits in a human 3D neural *in vitro* model resembling aspects of *in*  
93 *vivo* human and rodent brain development.

## 94 **Results**

95 To assess the emergence of low frequency oscillatory activity patterns and neuronal  
96 population bursts in human cortical circuits *in vitro*, we used human iPSC derived 3D neural  
97 aggregates (3DNAs) (Fig. 1A-F). To obtain 3DNAs, we used the “dual-SMAD inhibition”  
98 protocol for neural induction of human iPSCs to obtain neural rosettes comprising neural stem  
99 cells with a dorsal telencephalic identity (fig. 1A, (21-24)), which were stored as cryostocks  
100 of human iPSC-cortical neural stem cells. After thawing and re-plating, neural stem cells  
101 formed neural rosettes and individual neural rosettes gave rise to 3D neural aggregates (21-  
102 23). 3D neural aggregates comprised cortical neurons (fig. 1C, suppl. video 1), few astrocytes  
103 (fig. 1D, suppl. video 1, (22)) and oligodendroglial cells (suppl. video 1, (22, 25)). Cortical  
104 neurons in 3D neural aggregates had mature synapses indicated by pre- and post-synaptic  
105 marker staining (fig. 1E). The cortical identity of neurons within 3DNA was confirmed by  
106 several cortical markers present in MAP-2ab<sup>+</sup>- and bTubIII<sup>+</sup>-neurons (fig. 1F). Note that  
107 cortical neurons had clear axo-dendritic orientation with MAB-2ab<sup>+</sup>-soma and dendrites  
108 residing within the 3DNA (fig. 1C, suppl. video 1), while bTubIII<sup>+</sup>-axons projected radially  
109 outside of the 3DNA (fig. 1E, F, suppl. video 1). For an extensive cellular and  
110 electrophysiological characterization of our human iPSC-3DNA experimental model see  
111 previous work (21, 22, 25).

### 112 **Functional ontogeny of oscillatory slow-wave activity and synchronous neuronal** 113 **population spike/burst activity in early human iPSC-cortical circuits**

114 To assess whether low frequency oscillatory activity emerges and is associated with neuronal  
115 population spike/burst activity of human cortical neurons, 3D neural aggregates (50 to 60  
116 days post-iPSC stage) were cultured either on 9-electrode 6-well MEAs or 60-electrode  
117 single-well MEAs (fig. 1G). The first set of experiments was conducted by MEA recordings  
118 every three to five days for up to 4 weeks. During data acquisition, we first assessed the  
119 emergence of neuronal spiking, single-channel- and population bursting, as well as of low  
120 frequency oscillatory activity below 10Hz by visual inspection of both high-pass (> 200 Hz)  
121 and low-pass (< 10 Hz) filtered signals (fig. 1H).

122 In addition, we conducted offline data processing to confirm and assess properties of low  
123 frequency oscillatory activity in both time and frequency domains. In particular, we analyzed  
124 the time domain properties shape, organization, amplitude, duration and frequency of  
125 bandpass-filtered signals in the six frequency bands slow (< 1 Hz), delta (1—4 Hz), theta (4—  
126 11 Hz), beta (11—30 Hz), gamma (30—55 Hz) and high gamma (55—100 Hz); cf. figure 1H.  
127 While simple high- and low-pass filters (e.g. 2<sup>nd</sup> order Butterworth) provided by the MEA  
128 recording software MC\_Rack (Multichannel Systems (MCS)) proved sufficient for fast online  
129 visualization of both spike and slow oscillatory activity, we took care to employ high-order  
130 linear phase finite impulse response (FIR) filters for offline quantitative analysis in the  
131 separate frequency bands (cf. Methods; suppl. fig. 1). For frequency domain analyses, we

132 calculated average power spectral densities using Welch's method (cf. Methods) as well as  
133 power spectrograms. Eventually, we complemented our low-frequency analysis with  
134 evaluation of neuronal population bursting characteristics, including occasional spike  
135 morphology assessment (fig. 1H). In our 3DNA cultures, we regularly observed a succession  
136 of four different activity states, defined by both specific slow-wave activity and concomitant  
137 spike/burst patterns that we categorized as "type A" to "type C".

138 As described previously, human cortical neurons within the human 3DNA cultures establish  
139 synchronously spiking neuronal networks within 30 days after plating on MEAs, where the  
140 first spontaneous synchronous neuronal population bursts appear within 10–14 days *in*  
141 *vitro*(23). Here, with the appearance of the first population bursts (10–14 div), we observed  
142 low frequency oscillatory activity (0.5–1 Hz) that was barely visually detectable during  
143 online assessment (fig. 2A, column "Type A"). Spectrograms confirmed the presence of  
144 spontaneous low frequency oscillatory activity, which occurred during spontaneous  
145 synchronous population bursts (fig. 2A, type A). This indicates that low frequency oscillatory  
146 activity (< 1 Hz) is already associated with the early emergence of population bursts. We  
147 termed this early spontaneous neuronal network activity "Type A", characterized by slow-  
148 wave oscillatory activity with duration less than 1 second and low amplitude, where  
149 population bursts are phase-locked to the rising flank of the slow-wave.

150 After the appearance of type A network activity, we observed three other network activity  
151 types emerging within the next two weeks (14–30 div). In the following, we introduce  
152 human network activity types B1, B2 and C, and their distinct characteristics (fig. 2). Type B1  
153 network activity is defined by an increased number of population bursts (PBs), higher degree  
154 of neuronal network synchrony, slow oscillatory activity with increased amplitude and the  
155 emergence of delta band activity (1–4 Hz) (fig. 2, type B1). Type B2 network activity is  
156 characterized by the appearance of population super bursts (PSBs) composed of several  
157 consecutive PBs nested on slow-wave oscillatory delta band activity (fig 2, type B2). Type C  
158 network activity is characterized by longer PSBs composed of more consecutive PBs nested  
159 on slow-wave oscillatory delta band activity and prominent theta band (4–11 Hz) oscillatory  
160 activity (fig 2, type C).

161 Next, we asked if the different network activity types systematically appeared in a specific  
162 order during the early development of human cortical *in vitro* circuits. For this purpose, we  
163 assessed six individual 3DNA cultures from one and 16 individual 3DNA cultures from  
164 another experiment. We plotted the percentage of cultures showing type A, B1, B2, or type C  
165 network activity characteristics over time after the first detection of low-power slow  
166 oscillatory activity and associated population bursting (type A network activity). As shown in  
167 figure 2E, all 22 individual human neuronal circuits from two independent experiments  
168 developed from type A to B1, from type B1 to B2 and subsequently from type B2 to C.

169 These data provide evidence that in early synchronously spiking human iPSC derived cortical  
170 circuits an ontogeny of distinct early functional stages occurs and is characterized by a time-  
171 dependent shift in slow oscillatory activity from low (< 1 Hz) towards higher (delta, theta)  
172 frequencies. Network activity types A, B1 and B2 occur transiently, before a temporal plateau  
173 network stage (type C) develops within 40 days after the first onset of synchronous activity.

174 We repeated these experiments with 3DNA cultures obtained from three other human iPSC  
175 lines in 17 independent experiments, where each experiment comprised several individual  
176 3DNA cultures (suppl. figure 2). By using the data from 124 individual 3DNA cultures, we  
177 confirmed that the functional development trajectory given by transitions from type  
178 A → B1 → B2 → C occurred within 25—40 days after the first onset of synchronous spiking  
179 (suppl. fig 2B).

180 While the transition time points from one oscillatory activity type to the next showed  
181 temporal variability between individual 3DNA cultures and experiments, we reproducibly  
182 detected a clear sequential development trajectory A → B1 → B2 → C: emergence of distinct  
183 low frequency oscillatory activity types accompanied by distinct neuronal population burst  
184 pattern characteristics. Our data demonstrate that the formation of synchronous neuronal  
185 networks is not the endpoint of network maturation, which indicates that beyond functional  
186 network formation, additional *in vitro* conserved sequential cellular and synaptic  
187 neurodevelopmental processes likely occur that are reflected in the consecutive emergence of  
188 slow oscillatory activity types and population burst patterns in early developing human  
189 cortical circuits.

### 190 **Origin and properties of oscillatory slow-wave activity in human iPSC-derived 3DNA** 191 **cultures**

192 Next, we showed that suppression of fast glutamatergic transmission by chemical inhibition of  
193 NMDA- and AMPA-receptors resulted in the elimination of synchronous neuronal population  
194 bursting and slow oscillatory activity, while uncorrelated neuronal spiking detected by several  
195 electrodes was preserved (suppl. video 2). Elimination of synchronous neuronal population  
196 bursts and oscillatory slow-wave activity could also be achieved by blocking voltage-gated  
197 sodium channels after tetrodotoxin (TTX) application (suppl. video 2). Under TTX  
198 conditions, no uncorrelated neuronal spiking could be detected (suppl. video 2). In addition,  
199 no slow oscillatory activity could be detected in early 3DNA cultures (within 7 div), which  
200 only exhibited uncorrelated neuronal spiking activity (suppl. fig. 3). These experiments  
201 emphasize that oscillatory slow-wave activity recorded in early developing human *in vitro*  
202 cortical circuits depends on neuronal excitability and excitatory synaptic communication—  
203 both also prerequisites of synchronous neuronal population activity.

204 Local field potentials recorded by electrodes *in vitro* or *in vivo* are considered to reflect  
205 voltage fluctuations, summed up over a ball of ~ 200 μm diameter, that originate from dipole



206 currents during synchronous activity of oriented neurons and then propagate through neuronal  
207 tissue (26). Since cortical neurons in our 3DNA showed a clear axo-dendritic orientation (fig.  
208 1, fig 3B and suppl. video1), we assessed if the detection of slow-wave oscillatory activity  
209 required that electrodes were covered by clusters of neurons within 3DNAs (fig. 3A, suppl.  
210 video 1). To this end, we examined 291 electrodes detecting oscillatory slow-wave activity for  
211 simultaneous 3DNA coverage as a possible prerequisite.

212 Indeed, roughly 95% of all electrodes detecting slow-wave oscillatory activity were covered  
213 by 3DNAs (276 out of 291 electrodes, 94,8%, fig. 3A), consistent with the concept that 3-  
214 dimensional neuronal clusters with axo-dendritic orientation strongly support slow-wave  
215 oscillatory activity that most likely cannot be detected from individual neurons or axonal  
216 processes.

217 Interestingly however, roughly 5% of electrodes detecting low frequency oscillatory activity  
218 were not directly covered but rather in close vicinity to 3DNAs (15 out of 291 electrodes,  
219 5.15%, fig. 3A, ii), indicating that electrodes can detect oscillatory slow-wave activity even at  
220 some lateral distance from the neuronal signal source. While axonal propagation of action  
221 potentials (APs) preserves AP waveforms over long distances, electrical signals propagating  
222 through a liquid or solid medium are attenuated in a frequency dependent manner: for low-  
223 frequency electrical signals (e.g. delta waves, 1—4 Hz), attenuation is much lower than for  
224 high frequencies as e.g. in spikes (> 1000 Hz), which is consistent with our observation of  
225 delta band oscillatory activity on electrodes distant from 3DNAs.

226 We therefore surmise that low-frequency oscillatory activity may more sensitively detect the  
227 presence of neuronal activity than neuronal spiking. To test this hypothesis, we conducted an  
228 experiment where twenty to thirty 3DNAs were distributed and cultured on an  $8 \times 8$   
229 microelectrode array. On these MEAs with a  $1.84 \times 1.84 \text{ mm}^2$  recording area, each  $30 \mu\text{m}$   
230 diameter electrode has a center-to-center distance of  $200 \mu\text{m}$  to its neighboring electrodes. In  
231 recordings of spatially distributed 21 div human iPSC-derived 3DNA cultures, we observed  
232 that only few electrodes detected spiking activity—in the exemplary recording shown in  
233 figure 3C in the form of population super bursting—, while considerably more electrodes  
234 detected low frequency oscillatory delta band activity (1—4 Hz) (fig. 3C, ii). The sole  
235 assessment of spike activity by e.g. spatial heat maps provided the impression that only a  
236 minor fraction of cultured 3DNAs contained electrophysiologically active neurons and that  
237 the spatially distributed individual 3DNAs were not functionally interconnected (fig. 3E ii). In  
238 contrast, spatial heat maps of slow-wave oscillatory activity revealed that many individual  
239 3DNAs contained electrophysiologically active neurons, and that neurons within individual  
240 3DNAs were functionally interconnected as evidenced by spontaneous synchronous slow  
241 oscillatory activity detected in spatially distributed individual 3DNAs (fig. 3E i). Thus,  
242 measurements of slow-wave oscillatory activity provide complementary information about  
243 neuronal activity and interconnectivity of spatially distributed human 3D neural aggregates.

244 **Functional ontogeny of oscillatory slow-wave activity and synchronous neuronal**  
245 **population spike/burst activity in late-stage human iPSC-cortical circuits**

246 In a second set of experiments, we assessed if the so far observed slow-wave oscillatory  
247 activity and population burst patterns persisted in long-term cultures of 3DNAs, and if  
248 additional low frequency oscillatory activity and population burst patterns emerged over time.  
249 For this purpose, we cultured 3DNAs on 9-electrode arrays (6-well MEAs) for up to three  
250 months and applied the same assessment and analysis paradigms as used in the first set of  
251 experiments.

252 3DNA cultures consecutively developed into the types  $A \rightarrow B1 \rightarrow B2 \rightarrow C$  of synchronously  
253 active neuronal networks (fig. 4, first column) confirming once more the results from our first  
254 set of experiments.

255 At later times, however, we observed another neuronal network activity pattern (type D)  
256 where prominent beta band oscillatory activity (11—30 Hz) emerged and PSB was absent and  
257 PBs appear as single events (starting around 40 to 50 days after the onset of synchronous  
258 activity (fig 4, third column).

259 Even longer cultivation times revealed the emergence of yet another type (type E), where PBs  
260 either occurred as groups of three to four PB or as single events. A key hallmark of type E  
261 neuronal network activity was the emergence of gamma band (30—55 Hz) oscillatory activity  
262 (fig 4, fourth column). In all experiments and all cultures, we observed that the peak  
263 amplitudes of all oscillatory activity envelopes showed a progressive increase over the time  
264 course of three months (fig. 4D-G).

265 We also noticed that the structure of individual population bursts and the wave form of slow  
266 (< 1) and delta band (1—4 Hz) oscillatory activity changed over time (fig. 5). In detail, PBs  
267 during early neuronal circuits (type A—C) is a single PB nested on a single smooth wave with  
268 a frequency around 1 Hz. In late neuronal circuits (type D and E), the duration of an  
269 individual PB was longer (1.5 seconds), and the PBs comprised 6 to 8 sub-PBs (fig. 5).  
270 Interestingly, these PB characteristics remained stable for an additional month of cultivation.  
271 Furthermore, we could not observe other types of neuronal network activity patterns in long  
272 term cultures performed systematically over a time of three months, and occasionally up to  
273 four months. We repeated the experiment with another human iPSC cell line and observed the  
274 emergence of identical developmental stages within comparable timelines (suppl. fig.4). Thus,  
275 we conclude that type E network activity represents a final functional stage of *in vitro* human  
276 cortical circuit activity.

277 To summarize, we demonstrate a functional ontogeny in human 3D aggregates of brain cells  
278 which consists of five consecutive functional developmental stages, where each stage has  
279 specific oscillatory slow-wave activity and characteristic synchronous neuronal bursting  
280 patterns (fig.6).



## 281 **Discussion**

282 Progress in understanding physiological and pathological oscillatory human brain activity has  
283 been hampered by limited access to primary human tissue and limited translatability of animal  
284 models. Mechanisms involved in the emergence of oscillatory activity in fetal human  
285 neuronal networks cannot be studied during very early human brain development stages *in*  
286 *vivo*, and scalp electrodes applied on pre-term babies do not have sufficient spatial resolution  
287 to capture neuronal spiking or bursting activity. Moreover, animal models lack human  
288 specific neural cells (14, 15). Thus, an accessible human neuronal *in vitro* model, in which the  
289 emergence and properties of neuronal population bursting and oscillatory slow-wave activity  
290 can be simultaneously studied, represents an opportunity to overcome current limitations. The  
291 accessibility of human iPSC-derived neural *in vitro* models will uniquely enable intervention  
292 studies and provide novel insights about human neuronal circuit function. In this light, we  
293 believe assessing the emergence and properties of oscillatory activity recorded from hiPSC-  
294 neuronal circuits *in vitro* will help to better understand human brain function.

295 Our experimental paradigm of adherently growing 3D neural aggregates has been utilized to  
296 assess the development and properties of synchronous mouse (27) and human pluripotent  
297 stem cell-derived neuronal population bursting (23), to evaluate effects of clinically relevant  
298 compounds on human neuronal network function (28), and to provide insights into the cellular  
299 neural ontogeny (29) and corticogenesis (30). For instance, Edri *et al.* presented the cellular  
300 ontogeny of neuroepithelial cells and radial glia cells within neural rosettes (29). We and  
301 others (29), have provided a detailed description about how individual neural rosettes give  
302 rise to adherently growing 3D neural aggregates (23, 29). Thus, our experimental paradigm of  
303 3D neural aggregates represents a fast, robust and cost-efficient 3D human neural *in vitro*  
304 model to assess specific aspects of cellular and functional human brain ontogeny *in vitro*.

305 While brain organoid models have recently gained popularity in science, this experimental  
306 paradigm has several drawbacks, among which there are lengthy and costly experiments, high  
307 experimental variability, insufficient and unphysiologically long neuronal maturation and  
308 high degree of cell stress (for a recent review see (31)). In this work, we aimed to evaluate if  
309 human iPSC-derived 3D neural aggregates provide insights into the emergence of oscillatory  
310 slow-wave activity in developing human iPSC-cortical circuits.

311 The use of hiPSC-derived neural *in vitro* models to assess oscillatory activity of human  
312 neurons *in vitro* is still in its infancy. As of today, there is only one systematic published  
313 study (19) about the emergence and properties of delta band oscillations and changes of  
314 population burst characteristics in developing human neurons, viz. brain organoids. In the  
315 following sections, we will compare and discuss currently available data about the emergence  
316 of oscillatory slow-wave activity in brain organoids with the data obtained from 3DNAs  
317 presented in this work.

318 ***Developmental and morphological properties of 3DNA and brain organoids***

319 Similar to human brain organoids, 3D neural aggregates comprise neurons (fig. 1C, E, F,  
320 suppl. video 1), few astrocytes (fig. 1D, suppl. video 1) and oligodendroglial cells (suppl.  
321 video 1, REF), as well as more immature neural progenitor and neural stem cells (22). While  
322 human brain organoids are cultured free-floating, and often consist of several neural rosettes,  
323 3D neural aggregates are cultured adherently. Each 3DNA derived from an individual neural  
324 rosette that exhibits apical-basal orientation, shows interkinetic nuclear migration and  
325 neuronal differentiation at the apical side (23) similar to neural rosettes within free-floating  
326 brain organoids (19). Interestingly, neither neurons within brain organoids, nor neurons within  
327 3D neural aggregates are organized in layers. In detail, MAP-2ab<sup>+</sup>-neurons do express  
328 cortical-layer specific transcription factors (layer I to layer VI), however in the absence of  
329 cytoarchitecture. Even though brain organoids have been cultured for months up to years,  
330 only neural stem/progenitor cells within the proliferation zone show a cytoarchitecture  
331 resembling the layer specific transcription factor expression profile seen *in vivo*. Nevertheless,  
332 complex neuronal population bursting and oscillatory slow-wave activity emerges in both  
333 human 3D neural *in vitro* models (19, 32), which demonstrates that a layered organization of  
334 neurons is not a prerequisite for complex neuronal population functionality. In addition,  
335 primary cultures of mouse neurons, where a layered organization of neurons is also absent,  
336 show robust oscillatory activity within the delta, theta, beta and gamma bands (33, 34). When  
337 combining the data presented here with the data published by others, it becomes evident that  
338 layered organization of neurons is not crucial for their ability to generate slow-wave  
339 oscillatory activity, and may not even be crucial for brain function, as discussed by others (35,  
340 36). As our data demonstrate, oscillatory activity is primarily detectable in 3DNAs where  
341 neurons have axo-dendritic orientation, which seems to be a more important morphological  
342 prerequisite than layered organization.

343 ***Mesoscale functional ontogeny of neurons in 3DNA and brain organoids***

344 In this section, we aim to compare and discuss the timelines for the emergence and properties  
345 of population burst characteristics and oscillatory activity reported for neurons in brain  
346 organoids and for neurons in our 3DNA experimental paradigm presented here. A particular  
347 challenge for this comparison is that the protocols for brain organoid and 3DNA formation are  
348 different with respect to timelines for neural induction, NSC expansion, as well as organoid or  
349 3DNA formation. Since we are interested to compare the timelines and properties of  
350 mesoscale neuronal functionality in both 3D human neural *in vitro* models, we believe it is  
351 reasonable to start this comparison based on time points when brain organoids and 3DNA,  
352 respectively, were placed on the MEA. Even though there is currently only one study by  
353 Trujillo et al. (19) systematically describing the developmental emergence of oscillatory  
354 activity in brain organoids, combining this data set with our data presented here allows the  
355 discovery of remarkable similarities and differences.

356 The timelines from iPSC to brain organoid/3DNA formation, respectively, and placement on  
357 MEAs are 7—8 weeks (3DNA) and 10 weeks (brain organoids). It is important to note that  
358 brain organoids have been pre-matured for 6 weeks before placed on MEAs.

359 Within the first week after plating, neurons within 3DNA cultures show asynchronous  
360 activity, and they develop into synchronous neuronal networks within additional one to two  
361 weeks, as presented here and reported elsewhere (21-23, 28). As described by Trujillo et al.  
362 (19), neurons within adherently growing brain organoids show asynchronous activity one day  
363 after plating of 6-week old brain organoids on MEAs. Within additional two weeks, also  
364 neurons in brain organoids exhibit synchronous activity(19). Thus, neurons in human 3DNA  
365 and brain organoids exhibit nearly identical development timelines from  
366 electrophysiologically functional neurons with uncorrelated activity to the formation of  
367 functionally interconnected and synchronously active neuronal populations.

368 The formation of synchronously active neuronal networks has often been considered as a  
369 mature developmental endpoint (23, 37-39). However, as presented here and also described  
370 by Trujillo et al., this only reflects the first stage of neuronal mesoscale functionality, which is  
371 followed by additional changes in neuronal population burst and slow-wave oscillatory  
372 activity characteristics. In detail, 3DNA cultures show consecutive emergence of oscillatory  
373 slow-wave (onset within 2 weeks), delta (onset within 2—3 weeks), theta (onset within 3—4  
374 weeks), beta (onset within 4—6 weeks) and gamma/high gamma (onset within 6—8 weeks)  
375 activity, which are only detectable during synchronous neuronal activity. Trujillo et al. only  
376 characterized the emergence of delta activity and presented data about higher frequency bands  
377 (200—400 Hz), which are classified in the field rather as ripple activity (40) than gamma  
378 activity (40). As for the 3DNA model, delta activity (1—4 Hz) in brain organoids occurs  
379 exclusively during synchronous population bursts.

380 Another similarity between neurons in brain organoids and 3DNAs lies in characteristic  
381 changes of population bursts over time. In both 3D *in vitro* model systems, early PBs are  
382 < 1 sec long, appear as single synchronous events that progressively change over time into  
383 complex 1.5 to 2 seconds long PBs comprised of several sub-PBs. Since PBs are phase-locked  
384 to delta oscillations, changes in PB characteristics are also reflected in delta band wave forms,  
385 i.e. over time a transition of one delta wave with a wavelength < 1 second into 4 to 7 waves  
386 within a 2-second time window occurs. However, those characteristic changes in PB and delta  
387 band activity occur on different time scales: in 3DNAs within 4—6 weeks, and in brain  
388 organoids within 6 months (19). Along this line, delta power recorded from brain organoids  
389 and 3DNA cultures increases over time, presumably due to increased numbers of neurons  
390 participating in generating this oscillatory activity.

391 In addition, we demonstrated that population superbursting (PSB) is a neuronal population  
392 activity pattern emerging in a distinct stage during the development of early 3DNA cultures.  
393 Trujillo *et al.* (19) presented a spike raster plot showing clear presence of PSB in 10 months

394 old brain organoids (suppl. figure 10); it is, however, so far unknown, if this is a transient  
395 activity pattern in brain organoids.

396 To summarize, the mesoscale functional ontogeny of neurons within brain organoids and  
397 3DNAs share comparable aspects of developmental trajectories regarding (i) neuronal circuit  
398 formation, (ii) emergence and (iii) changes of population bursts and delta band activity, which  
399 indicates that conserved cellular developmental mechanisms may occur in both human 3D *in*  
400 *vitro* models. In addition, human neurons in 3DNAs consecutively generate spontaneous  
401 theta, beta and gamma band oscillations during distinct developmental stages, which has not  
402 been reported for neurons in brain organoid models yet. Interestingly, the timelines for the  
403 transition from asynchronous firing to synchronously active neurons in brain organoids and  
404 3DNA are identical, while the timelines for later mesoscale functional ontogeny of neuronal  
405 populations are substantially shorter for 3DNAs.

#### 406 ***Slow-wave oscillatory activity of human neurons in vitro and in vivo***

407 An important aspect to consider when comparing slow-wave oscillatory activity of human  
408 neurons *in vitro* and *in vivo* is that human brain organoids and 3DNAs are input-deprived. In  
409 principle, *in vitro* oscillatory activity could reflect activity properties observed in (i) isolated  
410 human brain slice preparations, (ii) deep NREM sleep EEG in adults, when cortical activity is  
411 largely deprived of and not modulated by sensory input from other brain regions(41), (iii) pre-  
412 term baby EEG at 24 to ~28 gestational weeks (gw), where sensory input is not fully  
413 established (10), or (iv) pre-term baby EEG at 30-31 gw until birth during quiescent stages  
414 (10) equivalent to non-REM sleep in adults.

415 Interestingly, recordings from pre-term infants show that within a time-period of 7 weeks  
416 (between gestational weeks 24 and 31) the transition of very slow oscillatory activity (< 1 Hz)  
417 to alpha-beta band oscillations (8—30 Hz) nested to delta band activity (1—2 Hz) is a general  
418 feature of human brain development (10, 11). Interestingly, we also observed a transition  
419 from low-to-high frequency oscillatory activity in our human 3D brain cell cultures occurring  
420 within weeks, and not months(19).

421 To summarize, it is tempting to discuss similarities and differences of emergence and  
422 properties of oscillatory slow-wave activity of human iPSC derived neurons *in vitro* compared  
423 to those recorded from human neurons in isolated brain slice preparations or recorded from  
424 human fetal and adult brain, but further studies are needed to reach a conclusion.

#### 425 **Future outlook**

426 We demonstrate that human 3D neural aggregate cultures represent a fast and robust human *in*  
427 *vitro* model for assessing the functional ontogeny of low frequency oscillatory activity and  
428 neuronal population activity during human neuronal circuit formation.

429 Functional ontogeny of oscillatory slow-wave activity and synchronous neuronal bursting  
430 patterns represents a novel concept with a high potential to reveal abnormal human neuronal

431 circuit development and function when applied on human iPSC models for human brain  
432 diseases and disorders. The described functional ontogeny in brain organoids and human 3D  
433 neural aggregate cultures presented here pave the way to identify prospective abnormal  
434 development and function of oscillatory slow-wave activity in human iPSC-based CNS  
435 disease models.

## 436 **Methods**

### 437 **Generation of human iPSC-derived 3D neural aggregates (3DNAs)**

438 The method is extensively described elsewhere (23). Shortly, hiPSC lines (C1, C2, C3) and  
439 the commercial human iPSC-line Chipsc4 (Takara, Sweden) were cultured and differentiated  
440 into cortical NSCs as described elsewhere (23). Within 10–14 days, hiPSC NSCs formed  
441 3DNAs(23) and 3DNAs were manually transferred on MEAs and cells were kept in  
442 BrainPhys medium with supplements.

443

### 444 **Immunocytochemistry and confocal imaging**

445 For the immunocytochemical characterization of human 3DNAs, human 3DNAs were seeded  
446 and cultured on PLO/Laminin-coated 96-well plates (Greiner) and cultured in BrainPhys  
447 media with supplements (23). The cultures were then washed in phosphate-buffered saline  
448 (PBS), pH 7.2, and fixed for 20 min in 4% paraformaldehyde at room temperature. After  
449 fixation, the cells were incubated with 1% bovine serum albumin for 30 min. Primary  
450 antibodies binding to neuronal (bIIIITub, MAP2ab, TBR1, CTIP2, SATB2, and Parvalbumin-  
451 PV), astrocytic (GFAP), and synaptic (PSD95, VGlut1) structures were diluted in blocking  
452 solution with 0.025% Triton-X and were applied at 4 °C overnight. After washing in PBS,  
453 appropriate secondary antibodies together with DAPI nuclear counterstaining were applied for  
454 2 h at room temperature. Images were collected with a confocal-laser scanning microscope  
455 (LSM 700 Zeiss).

456

### 457 **MEA recordings and analysis**

458 3DNAs were plated on either 6-well (3 × 3 electrodes) or single-well (8 × 8 electrodes) MEAs  
459 coated with PDL and laminin as previously described(23). Before start of recording, 3DNA  
460 cultures were left to equilibrate for ten minutes. For each culture condition, we performed five  
461 consecutive 2-minute long recordings for each 3DNA culture in culture medium.

462 Raw signals were recorded with a MEA2100 system (Multichannel Systems (MCS),  
463 Reutlingen), digitized at 25,000 Hz sampling rate with 16 bit resolution using the MC\_Rack  
464 software (version 4.6.2, MCS), and stored as MCD files for further offline analysis. Data from  
465 MCD files were accessed by the SPANNER software suite as well as the in-house developed  
466 in-house developed MATLAB software SSMT. For low-frequency LFP analysis, raw MEA  
467 signals sampled at 25 kHz were first downsampled to 1 kHz. For time domain analysis of  
468 local field potential oscillations, we separately determined five slowly varying time domain  
469 signal parts in the five frequency bands delta (1—4 Hz), theta (4—11 Hz), beta (11—30 Hz),  
470 gamma (30—55 Hz) and high gamma (55—100 Hz). In supplementary figure 1 A (i) to (iv),  
471 we present the FIR filter magnitude (dB) and phase (° degrees) response functions for the  
472 frequency bands delta, theta, beta and gamma. Power spectral analysis of the bandpass-  
473 filtered time domain signals is shown in supplementary figure 1 B. For frequency domain  
474 analysis of local field potential oscillations, we quantified spectral properties of the MEA



475 signal for frequencies below 100 Hz by its power spectral density PSD (power/frequency,  
476  $\mu\text{V}^2/\text{Hz}$ ) applying Welch's algorithm to the 1 kHz downsampled signal. In order to  
477 simultaneously display time domain and spectral properties, we also calculated power  
478 spectrograms of the 1 kHz downsampled signal. Numerical experiments with simulated spike  
479 trains at frequencies between 1 Hz and 10 Hz superimposed on pink noise (with 1/f power  
480 spectral density) showed that these spectrogram settings permitted clear detection of onset,  
481 fundamental frequency and harmonics of the spike trains (data not shown). These spectrogram  
482 settings are thus suited to distinguish "real" electrophysiological slow LFP oscillations from  
483 artifacts created by spike trains.

## 484 **Figure legends**

485

### 486 ***Figure 1 | Generation and assessment of hiPSC-derived 3D-neural aggregates (3DNAs)***

487 (A) Schematic representation of the applied procedure, basal medium used for *in vitro*  
488 generation of hiPSC 3DNAs. (B) Phase-contrast images showing the morphological  
489 properties of human iPSCs, NSCs, and 3DNA. Scale bars=50  $\mu\text{m}$ . (C) Confocal images  
490 visualizing MAP2-ab<sup>+</sup>-neurons at the bottom, middle and top of 3D-neural aggregate. (D)  
491 Confocal images visualizing GFAP<sup>+</sup>-astrocytes at the bottom, middle and top of 3D-neural  
492 aggregate. (E) Confocal images visualizing PSD95<sup>+</sup>-synaptic puncta and bIII tubulin<sup>+</sup>-neurons  
493 and vGLut1<sup>+</sup>-synapses in MAP2ab<sup>+</sup>-neurons within 3DNAs. (F, i, ii) Confocal images  
494 visualizing CTIP2<sup>+</sup>, SATB2<sup>+</sup> and TBR1<sup>+</sup> cortical MAP2ab<sup>+</sup>-neurons in 3DNAs. In C, D, F  
495 schematic drawings illustrate the z-level of image acquisition. (G) Schematic drawings,  
496 illustrating the electrode configuration in 6-well MEA and 1-well MEA, and phase contrast  
497 images showing the morphology of 3DNAs cultured on these MEAs. Scale bars=200  $\mu\text{m}$ . (H)  
498 Image acquisition and analysis workflow from left to right: Example MEA recordings  
499 showing raw data, high-pass filtered (> 200 Hz) and low-pass filtered (< 10 Hz) data on one  
500 individual channel (2<sup>nd</sup> order Butterworth filter). Exemplary spike waveform of one individual  
501 channel and exemplary spike analysis of one well of a 6-well MEA, visualizing spike raster  
502 plot and population firing diagram. Exemplary trace showing delta band filtered signal and  
503 envelope using high-order linear phase finite impulse response filter, Power Spectral Density  
504 diagram and spectrogram. Abbreviations: iPSC-induced pluripotent stem cell, NSC-neural  
505 stem cell, 3D-NA- 3D-neural aggregate, NM-neural maintenance medium, DM-  
506 dorsomorphin, RA-retinoic acid, MEA-microelectrode array, LFP-local field potential, PSD-  
507 power spectral density

508 **Figure 2 / Early ontogeny of synchronous bursting and oscillatory slow-wave activity**  
509 (A) Representative examples of 2-minute raw activity traces (blue) and superimposed delta  
510 envelope (orange) of different neuronal activity states (from type A to C, left to right) and  
511 their corresponding spectrograms. Zoomed-in 10 s window traces showing (B) the filtered  
512 spiking signal, (C, i) the filtered delta signal and envelope, and (C, ii) the filtered theta signal  
513 and envelope. (D) Power Spectral Density graphs corresponding to the different neuronal  
514 activity states, where the delta (grey) and theta (blue) frequency bands are highlighted. (E)  
515 Diagrams show the percentage of cultures exhibiting type A, B1, B2, or type C network  
516 activity characteristics over time after the first detection of synchronous spiking activity (day  
517 0) in experiment 1 (i) and 2 (ii).

518 **Figure 3 / Oscillatory slow-wave activity originates from neurons with a defined axo-**  
519 **dendritic orientation localized within 3DNAs**

520 (A, i) Phase-contrast image, showing the morphology of a 3D-neural aggregate 14 days after  
521 neural aggregate isolation and cultivation on the 9 electrodes of a 6-well MEA. The  
522 superimposed green traces visualize spiking and black traces visualize the delta signal  
523 recorded from the culture. (A, ii) Diagram shows the percentage of electrodes recording local  
524 field potentials when covered (white) or not covered (grey) by 3DNAs. The number of  
525 analyzed electrodes is given. (B) Confocal images visualizing MAP2ab<sup>+</sup>-neurons in the  
526 middle, and bIII tubulin<sup>+</sup>-neurons at the bottom of 3DNAs, stained 19 days after seeding  
527 3DNAs on coverslips. (C, i) Phase-contrast images, showing the morphology of 3D-neural  
528 aggregate cultures on 5 highlighted electrodes of a 60-electrode MEA, 21 days after seeding.  
529 Numbered boxes in (E) mark the highlighted electrodes, and corresponding recorded activity  
530 is shown in (C, ii, iii, D, E). (C, ii) Filtered spiking signal, delta band filtered signal and  
531 envelope, (C, iii) raw activity traces (blue) and superimposed delta envelope (orange) and  
532 their corresponding spectrograms. (D) Power Spectral Density graphs corresponding to the  
533 highlighted electrodes, (E) Spatial heat map showing detected (i) delta power and (ii) spiking  
534 activity on the 8 × 8 microelectrode array.

535 **Figure 4 / Late ontogeny of synchronous bursting and oscillatory slow-wave activity**

536 (A) Phase-contrast images, showing the morphology of a 3D-neural aggregate culture on the 9  
537 electrodes of a 6-well MEA over the time course of 120 days. Indicated days represent the  
538 days after the first onset of synchronous neuronal activity corresponding to the different  
539 activity stages from Type B2 to E. Corresponding (B) spike raster plots and (C) Power  
540 Spectral Density graphs, where the different frequency ranges are highlighted by coloured

541 boxes. Representative one channel filtered traces showing **(D)** delta trace and envelope, **(E)**  
542 theta trace and envelope, **(F)** beta trace and envelope and **(G)** gamma trace and envelope  
543 representative for the different activity states.

544 ***Figure 5 / Transition of smooth oscillatory slow-wave activity to nested oscillatory activity***  
545 ***during human neuronal circuit development in 3DNAs***

546 **(A)** Representative examples of 2-minute raw activity traces (blue) and superimposed delta  
547 envelopes (orange) for different neuronal activity states (from type B2 to E, left to right) and  
548 their corresponding spectrograms. The marked rectangles are shown below as zoomed-in 6 s  
549 window traces showing **(B)** the filtered spiking signal, **(C)** raw activity traces (blue) and  
550 superimposed delta envelopes (orange) and their corresponding spectrograms of different  
551 neuronal activity states (from type B2 to E, left to right).

552 ***Figure 6 Schematic overview of functional development stages***

553 Human iPSC-derived 3D neural aggregates (3DNAs) generate local field potentials composed  
554 of a high-frequency component (>1kHz, neuronal spiking) and a low frequency component  
555 (oscillatory slow-wave activity). Schematic illustration summarize the functional ontogeny in  
556 human 3D aggregates of brain cells which consists of five consecutive functional  
557 developmental stages, where each stage has specific oscillatory slow-wave activity and  
558 characteristic synchronous neuronal bursting patterns

559 ***Supplementary Figure 1 / Bandpass filter responses***

560 **(A)** Magnitude and phase responses of the used high-order linear phase finite impulse  
561 response filters for **(i)** delta, **(ii)** theta, **(iii)** beta and **(iv)** gamma frequency bands. **(B)**  
562 Exemplary Power Spectral Density graphs **(i)** for the full recorded signal and **(ii)** as overlays  
563 of the five bandpass filtered signals with colored areas for better visualization of frequency  
564 bands. The full PSD graph completely overlaps the individual bandpass filtered PSDs.  
565 Related to method section.

566 ***Supplementary Figure 2 / Early ontogeny of synchronous bursting and oscillatory slow-***  
567 ***wave activity in four cell lines***

568 **(A)** Table summarizing the used cell lines and number of experiments and replicates **(B)**  
569 Representative examples of **(i)** 2-minute raw activity traces (blue) and superimposed delta  
570 envelopes (orange) of one channel showing Type C activity in three different hiPSC lines, **(ii)**  
571 their corresponding spectrograms and **(iii)** Power Spectral Density graphs. The days after  
572 seeding on MEAs are given. Related to figure 2.

573 *Supplementary Figure 3 / Absence of oscillatory slow-wave activity in asynchronously*  
574 *active neuronal populations*

575 (A, i) Phase-contrast image, showing the morphology of a 3D-neural aggregate culture on the  
576 9 electrodes of a 6-well micro-electrode array 6 days after seeding on the MEA plate. (A, ii)  
577 Corresponding spike traces (high pass filtered > 200 Hz) of the 3 × 3 electrode array, showing  
578 uncorrelated spiking activity, with (A, iii) zoomed-in channel 4 and spike waveform  
579 visualization. (B, i) Representative spectrograms of 4 individual channels and (B, ii) Power  
580 Spectral Density graphs showing the absence of oscillatory activity. Note that the bottom  
581 graph corresponds to the ground electrode and represents electronic 1/f noise.

582 *Supplementary Figure 4 / Late ontogeny of oscillatory slow-wave activity in cell line 2*

583 Example traces showing the oscillatory activity of hiPSC line 2, 70 days after onset of  
584 synchronous activity on MEA. (A) Power Spectral Density graph, where the different  
585 frequency bands are highlighted by colored boxes. (B, i) Representative example of 2-minute  
586 raw activity trace (blue) and superimposed delta envelope (orange) with its corresponding  
587 spectrogram. The marked rectangle is shown as zoomed-in a 6s window in (B, ii). (C) delta,  
588 theta, beta, gamma traces and envelopes. Related to figure 4.

589

590 *Supplementary Video 1 / Spatial localization of neurons, astrocytes and oligodendroglial*  
591 *cells in human iPSC-3D neural aggregates.*

592

593 *Supplementary Video 2 / Oscillatory slow-wave activity depends on synaptic function and*  
594 *neuronal activity.*

595

## 596 References

597

- 598 1. L. F. Haas, Hans Berger (1873–1941), Richard Caton (1842–1926), and  
599 electroencephalography. *Journal of Neurology, Neurosurgery & Psychiatry* **74**,  
600 9-9 (2003).
- 601 2. J. R. Smith, The electroencephalogram during normal infancy and childhood: I.  
602 Rhythmic activities present in the neonate and their subsequent development. *The*  
603 *Pedagogical Seminary and Journal of Genetic Psychology* **53**, 431-453 (1938).
- 604 3. J. R. Smith, The electroencephalogram during normal infancy and childhood: II. The  
605 nature of the growth of the alpha waves. *The Pedagogical Seminary and Journal of*  
606 *Genetic Psychology* **53**, 455-469 (1938).
- 607 4. J. R. Smith, The electroencephalogram during normal infancy and childhood: III.  
608 Preliminary observations on the pattern sequence during sleep. *The Pedagogical*  
609 *Seminary and Journal of Genetic Psychology* **53**, 471-482 (1938).
- 610 5. D. B. Lindsley, Heart and Brain Potentials of Human Fetuses in Utero. *The American*  
611 *Journal of Psychology* **55**, 412-416 (1942).
- 612 6. F. A. Gibbs, E. L. Gibbs, Atlas of electroencephalography. (1941).
- 613 7. J. G. Hughes, U. BROWN, Electroencephalography of the newborn: I. Studies on  
614 normal, full term, sleeping infants. *American Journal of Diseases of Children* **76**, 503-  
615 512 (1948).
- 616 8. H. Mai, G. Schaper, Elektroencephalographische Untersuchungen an Frühgeborenen.  
617 *Ann Paediatr* **180**, 345-365 (1953).
- 618 9. H. Mai, E. Schütz, H.-W. Müller, Über das Elektrencephalogramm von Frühgeburten.  
619 *Zeitschrift für Kinderheilkunde* **69**, 251-261 (1951).
- 620 10. M. Andre *et al.*, Electroencephalography in premature and full-term infants.  
621 Developmental features and glossary. *Neurophysiol Clin* **40**, 59-124 (2010).
- 622 11. A. Dereymaeker *et al.*, Review of sleep-EEG in preterm and term neonates. *Early*  
623 *Hum Dev* **113**, 87-103 (2017).
- 624 12. S. H. Bitzenhofer, J. A. Pöppel, I. Hanganu-Opatz, Gamma activity accelerates  
625 during prefrontal development. *Elife* **9**, (2020).
- 626 13. H. J. Luhmann, Neurophysiology of the Developing Cerebral Cortex: What We Have  
627 Learned and What We Need to Know. *Front Cell Neurosci* **15**, (2022).
- 628 14. L. Beaulieu-Laroche *et al.*, Allometric rules for mammalian cortical layer 5 neuron  
629 biophysics. *Nature* **600**, 274-278 (2021).
- 630 15. B. B. Lake *et al.*, Neuronal subtypes and diversity revealed by single-nucleus RNA  
631 sequencing of the human brain. *Science (New York, N.Y.)* **352**, 1586-1590 (2016).
- 632 16. J. Wickham *et al.*, Inhibition of epileptiform activity by neuropeptide Y in brain tissue  
633 from drug-resistant temporal lobe epilepsy patients. *Sci Rep* **9**, 19393 (2019).
- 634 17. J. Wickham *et al.*, in *EPILEPSIA*. (WILEY 111 RIVER ST, HOBOKEN 07030-5774,  
635 NJ USA, 2019), vol. 60, pp. 214-214.
- 636 18. M. Astick, P. Vanderhaeghen, in *Current Topics in Developmental Biology*, A. H.  
637 Brivanlou, Ed. (Academic Press, 2018), vol. 129, pp. 67-98.
- 638 19. C. A. Trujillo *et al.*, Complex Oscillatory Waves Emerging from Cortical Organoids  
639 Model Early Human Brain Network Development. *Cell stem cell* **25**, 558-569 e557  
640 (2019).
- 641 20. R. A. Samarasinghe *et al.*, Identification of neural oscillations and epileptiform  
642 changes in human brain organoids. *Nature neuroscience* **24**, 1488-1500 (2021).
- 643 21. J. Izsak *et al.*, TGF- $\beta$ 1 Suppresses Proliferation and Induces Differentiation in Human  
644 iPSC Neural in vitro Models. *Frontiers in Cell and Developmental Biology* **8**, (2020).

- 645 22. J. Izsak, H. Seth, S. Theiss, E. Hanse, S. Illes, Human Cerebrospinal Fluid Promotes  
646 Neuronal Circuit Maturation of Human Induced Pluripotent Stem Cell-Derived 3D  
647 Neural Aggregates. *Stem Cell Reports* **14**, 1044-1059 (2020).
- 648 23. J. Izsak *et al.*, Robust Generation of Person-Specific, Synchronously Active Neuronal  
649 Networks Using Purely Isogenic Human iPSC-3D Neural Aggregate Cultures. *Front*  
650 *Neurosci* **13**, 351 (2019).
- 651 24. Y. Shi, P. Kirwan, F. J. Livesey, Directed differentiation of human pluripotent stem  
652 cells to cerebral cortex neurons and neural networks. *Nature protocols* **7**, 1836-1846  
653 (2012).
- 654 25. J. Izsak *et al.*, Differential acute impact of therapeutic effective and overdose  
655 concentration of lithium on human neuronal single cell and network function. *Transl*  
656 *Psychiatry* **accepted**, (2021).
- 657 26. A. Destexhe, C. Bedard, in *Scholarpedia*, Scholarpedia, Ed. (Scholarpedia,  
658 Scholarpedia, 2013).
- 659 27. S. Illes, S. Theiss, H. P. Hartung, M. Siebler, M. Dihne, Niche-dependent development  
660 of functional neuronal networks from embryonic stem cell-derived neural populations.  
661 *BMC neuroscience* **10**, 93 (2009).
- 662 28. J. Izsak *et al.*, Differential acute impact of therapeutically effective and overdose  
663 concentrations of lithium on human neuronal single cell and network function.  
664 *Translational psychiatry* **11**, 1-15 (2021).
- 665 29. R. Edri *et al.*, Analysing human neural stem cell ontogeny by consecutive isolation of  
666 Notch active neural progenitors. *Nature communications* **6**, 6500 (2015).
- 667 30. N. Gaspard *et al.*, An intrinsic mechanism of corticogenesis from embryonic stem  
668 cells. *Nature* **455**, 351-357 (2008).
- 669 31. X. Qian, H. Song, G. L. Ming, Brain organoids: advances, applications and challenges.  
670 *Development (Cambridge, England)* **146**, (2019).
- 671 32. R. Yokoi *et al.*, Analysis of signal components < 500 Hz in brain organoids coupled to  
672 microelectrode arrays: A reliable test-bed for preclinical seizure liability assessment of  
673 drugs and screening of antiepileptic drugs. *Biochem Biophys Rep* **28**, 101148 (2021).
- 674 33. S. S. Leondopulos, M. D. Boehler, B. C. Wheeler, G. J. Brewer, Chronic stimulation  
675 of cultured neuronal networks boosts low-frequency oscillatory activity at theta and  
676 gamma with spikes phase-locked to gamma frequencies. *J Neural Eng* **9**, 026015  
677 (2012).
- 678 34. I. Colombi, F. Tinarelli, V. Pasquale, V. Tucci, M. Chiappalone, A Simplified In vitro  
679 Experimental Model Encompasses the Essential Features of Sleep. *Front Neurosci* **10**,  
680 315 (2016).
- 681 35. J. Guy, J. F. Staiger, The Functioning of a Cortex without Layers. *Frontiers in*  
682 *Neuroanatomy* **11**, (2017).
- 683 36. J. Guy *et al.*, Intracortical Network Effects Preserve Thalamocortical Input Efficacy in  
684 a Cortex Without Layers. *Cerebral cortex (New York, N.Y. : 1991)* **27**, 4851-4866  
685 (2017).
- 686 37. A. Odawara, Y. Saitoh, A. H. Alhebshi, M. Gotoh, I. Suzuki, Long-term  
687 electrophysiological activity and pharmacological response of a human induced  
688 pluripotent stem cell-derived neuron and astrocyte co-culture. *Biochemical and*  
689 *biophysical research communications* **443**, 1176-1181 (2014).
- 690 38. F. Hofmann, H. Bading, Long term recordings with microelectrode arrays: studies of  
691 transcription-dependent neuronal plasticity and axonal regeneration. *Journal of*  
692 *physiology, Paris* **99**, 125-132 (2006).



- 693 39. B. Mossink *et al.*, Human neuronal networks on micro-electrode arrays are a highly  
694 robust tool to study disease-specific genotype-phenotype correlations in vitro. *Stem*  
695 *Cell Reports* **16**, 2182-2196 (2021).
- 696 40. M. Bazhenov, I. Timofeev, Thalamocortical oscillations. *Scholarpedia* **1**, 1319 (2006).
- 697 41. R. E. Brown, R. Basheer, J. T. McKenna, R. E. Strecker, R. W. McCarley, Control of  
698 sleep and wakefulness. *Physiol Rev* **92**, 1087-1187 (2012).
- 699

A

## experimental design

| iPSC proliferation | neural induction and proliferation |       | neural proliferation | 3D-NA formation |
|--------------------|------------------------------------|-------|----------------------|-----------------|
| days in stage      | 8-10                               | 10-14 | 6-26                 | 7-10            |
| mTeSR / DEF-CS     | DM                                 | DM    | DM                   | DM              |
| total days         | 0                                  | 8-10  | 18-24                | 24-50           |
|                    |                                    |       |                      | 31-60           |

B

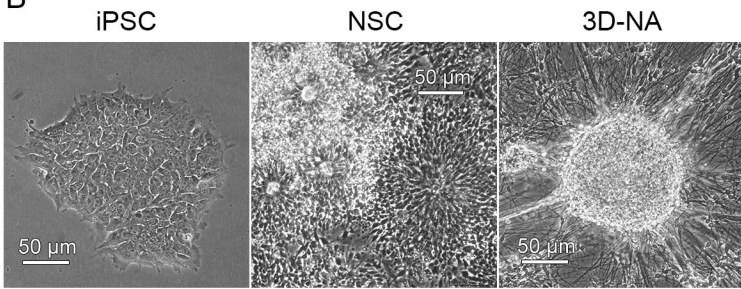

C

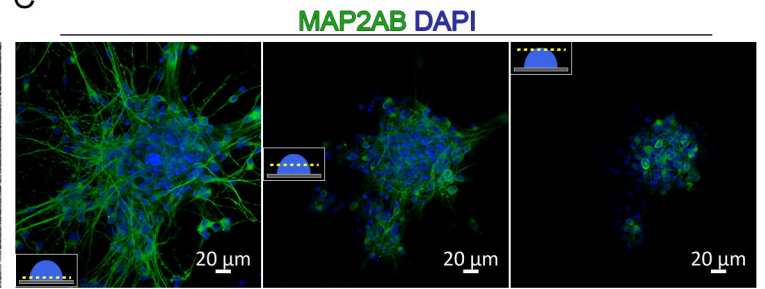

D

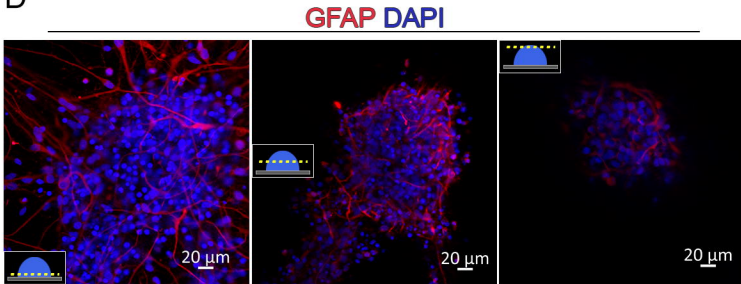

F

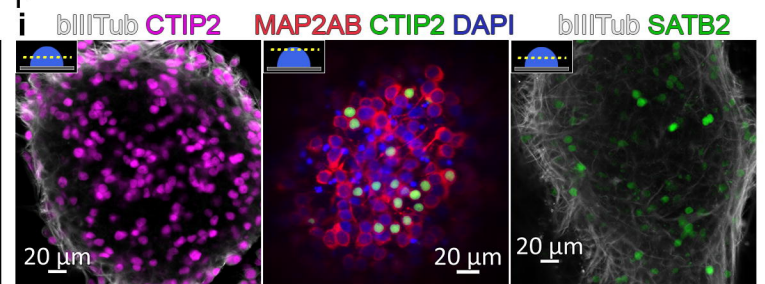

E

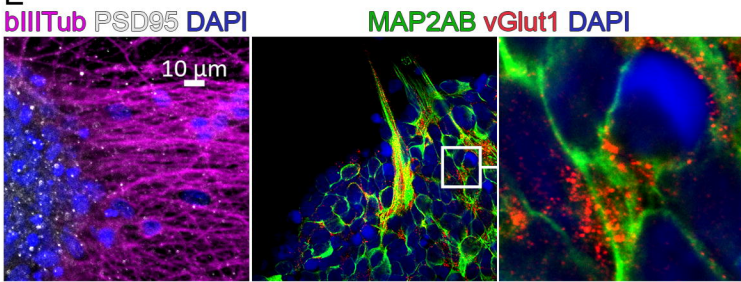

ii

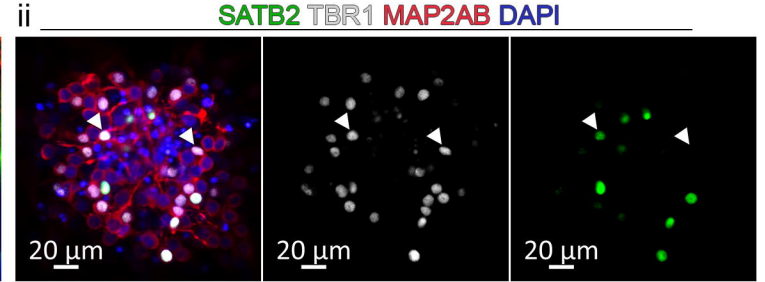

G

## 3D-NAs on 6-well MEA

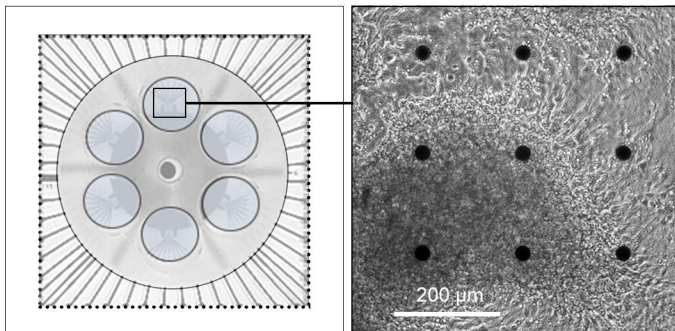

## 3D-NAs on 1-well MEA

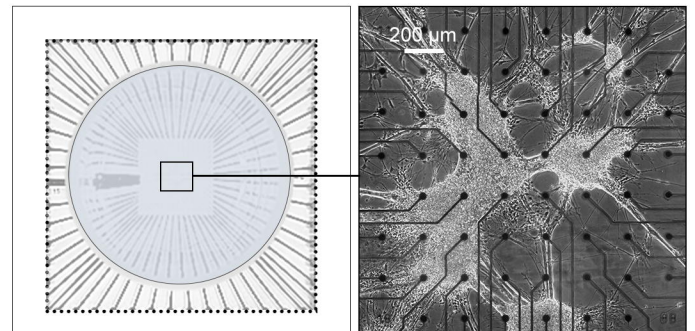

H

## acquisition and online filtering

## spike analysis

## LFP analysis

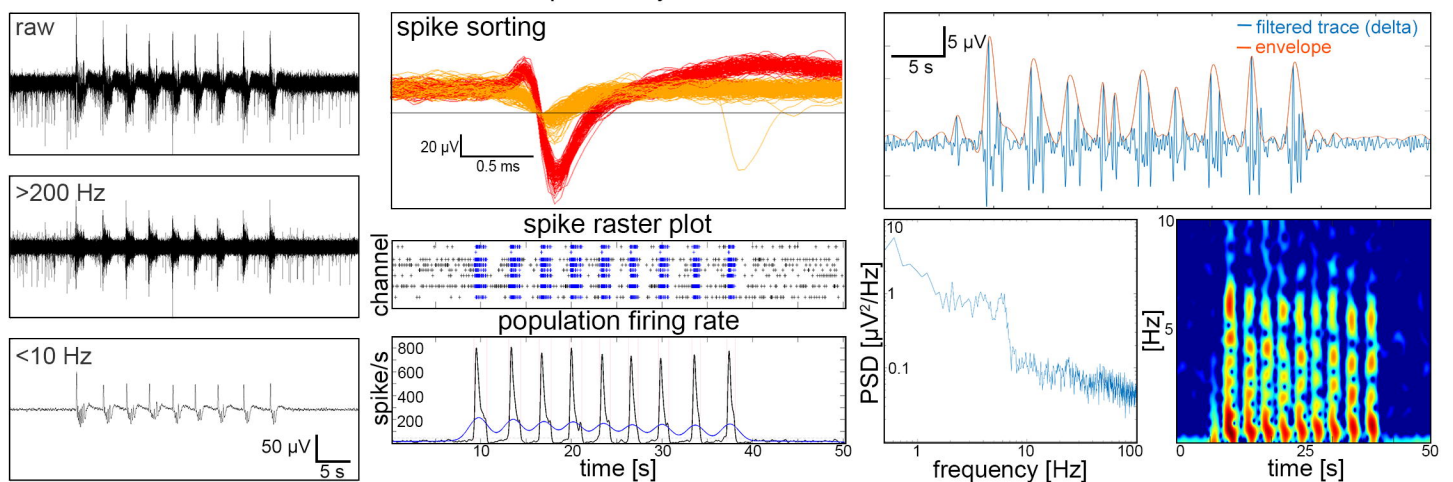



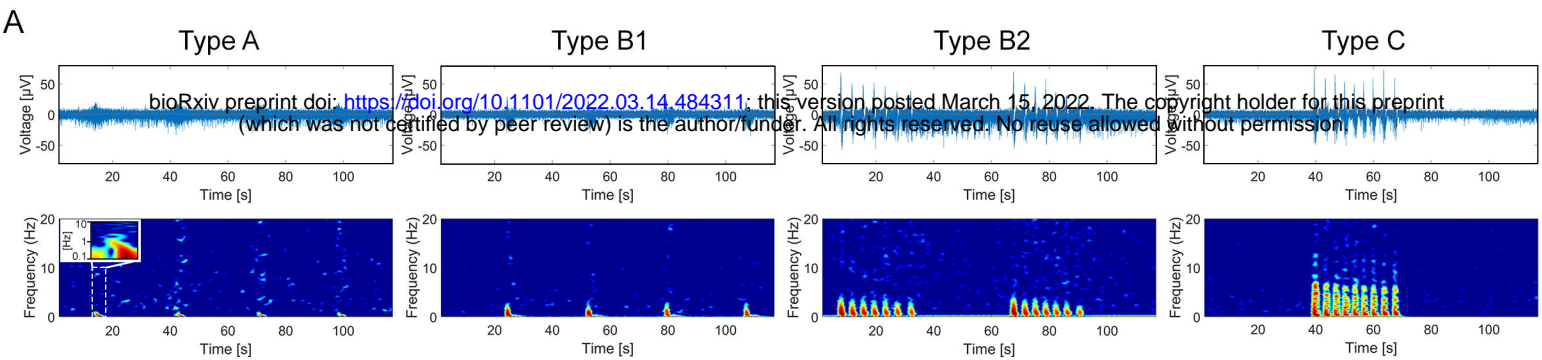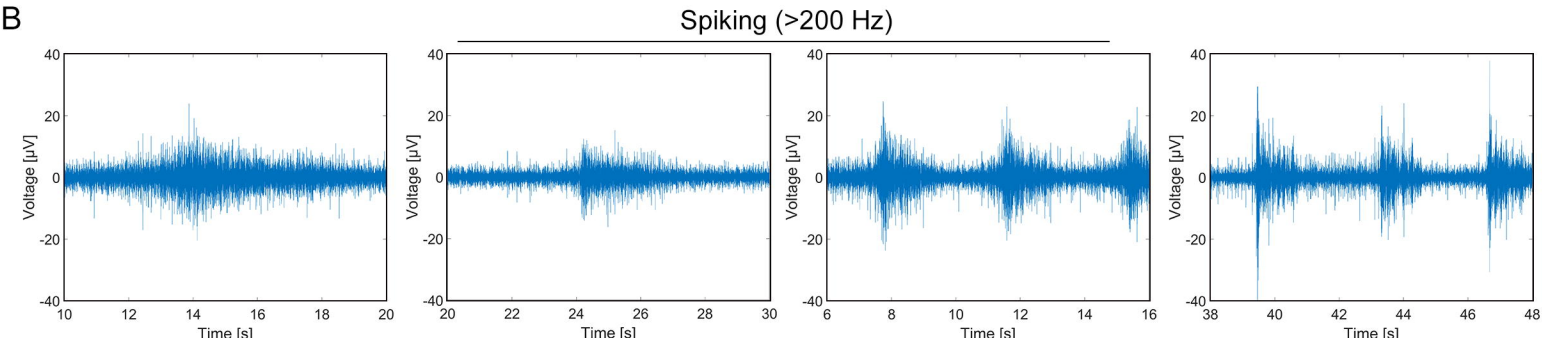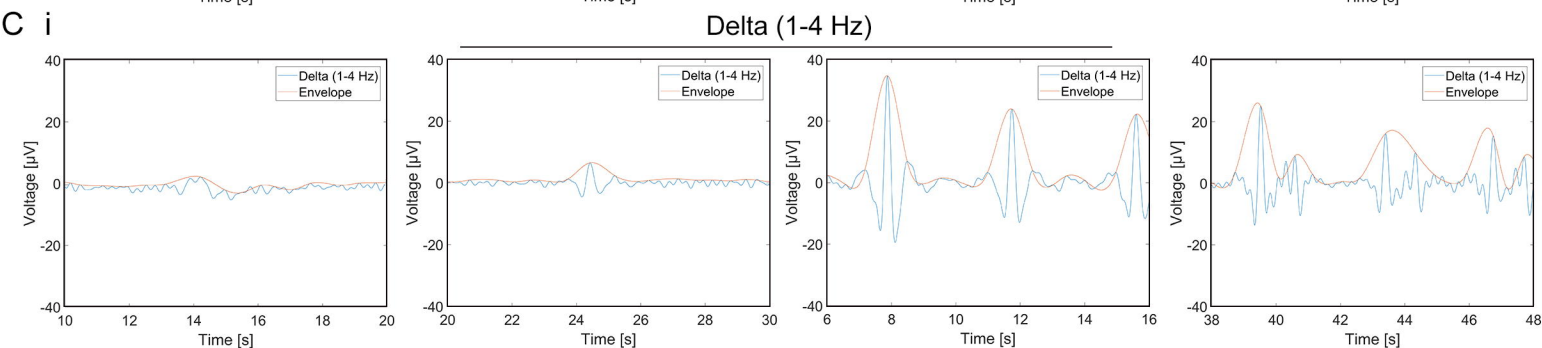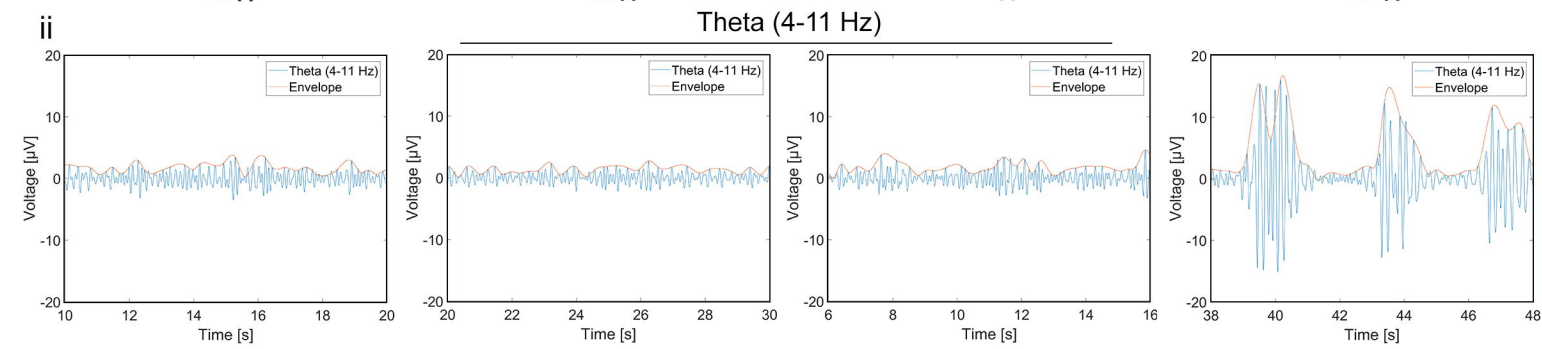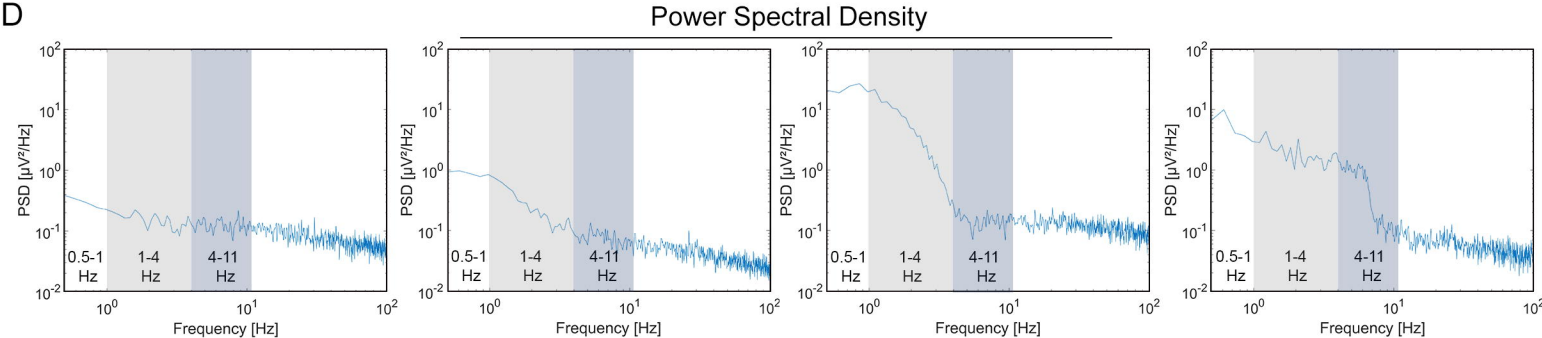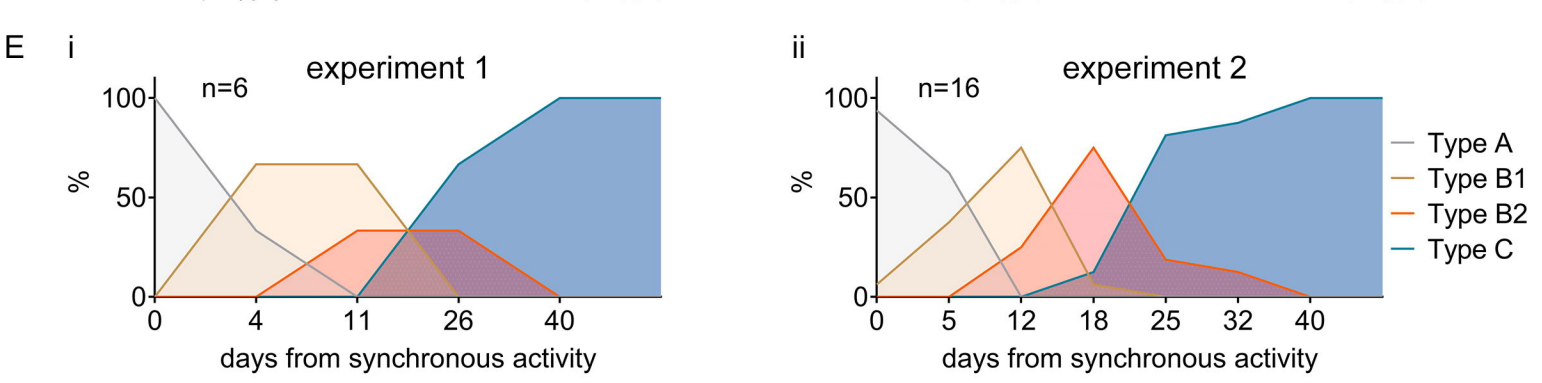

A

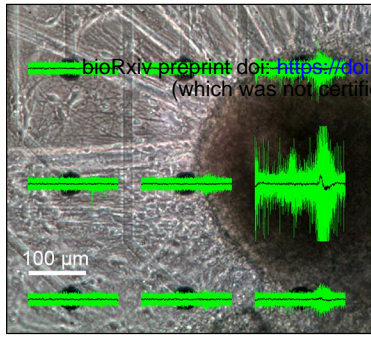

ii

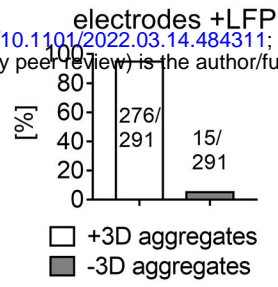

B

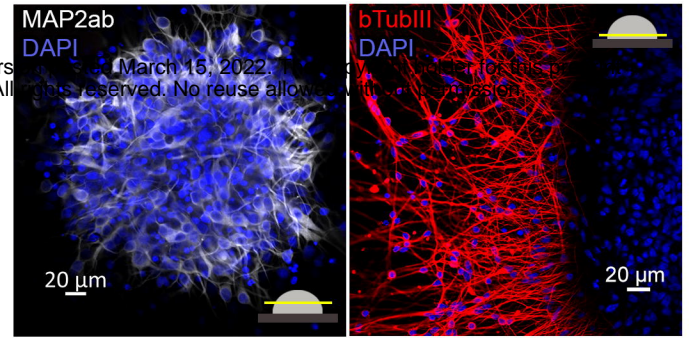

C

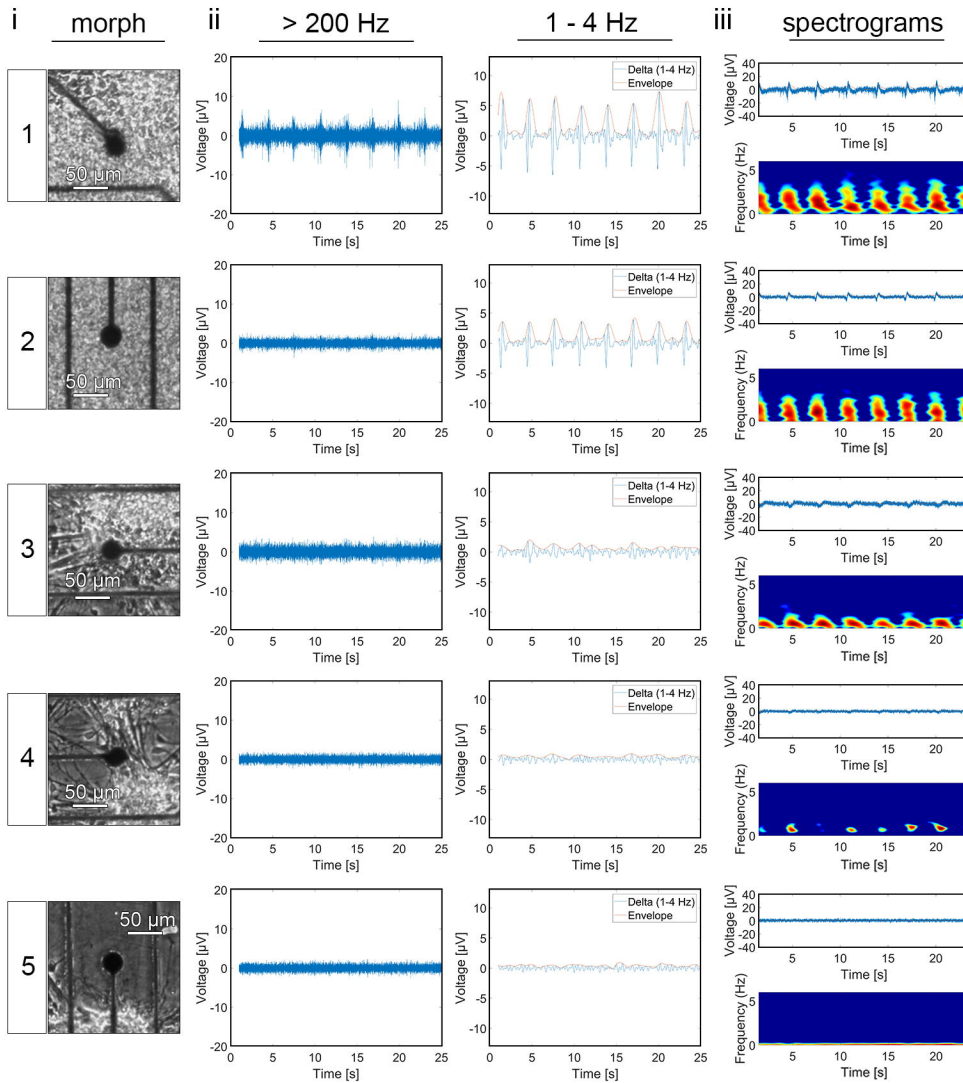

D

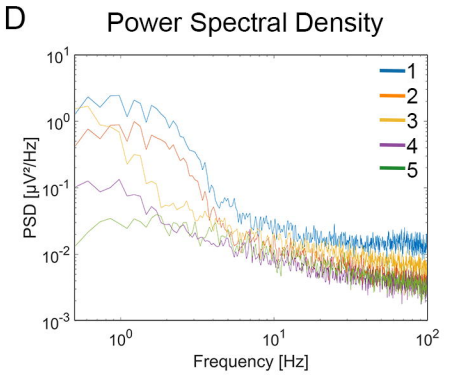

E

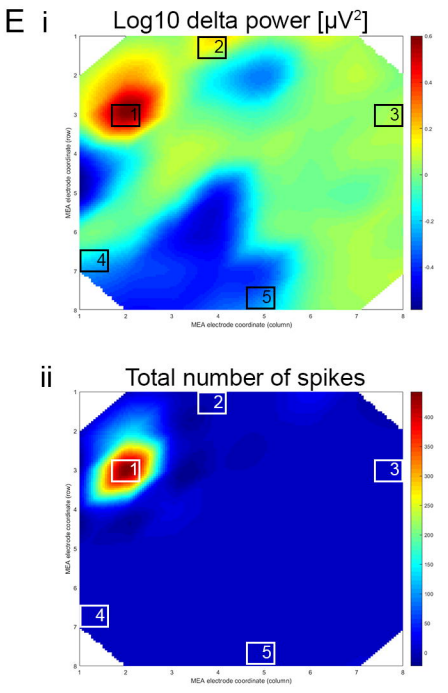



A

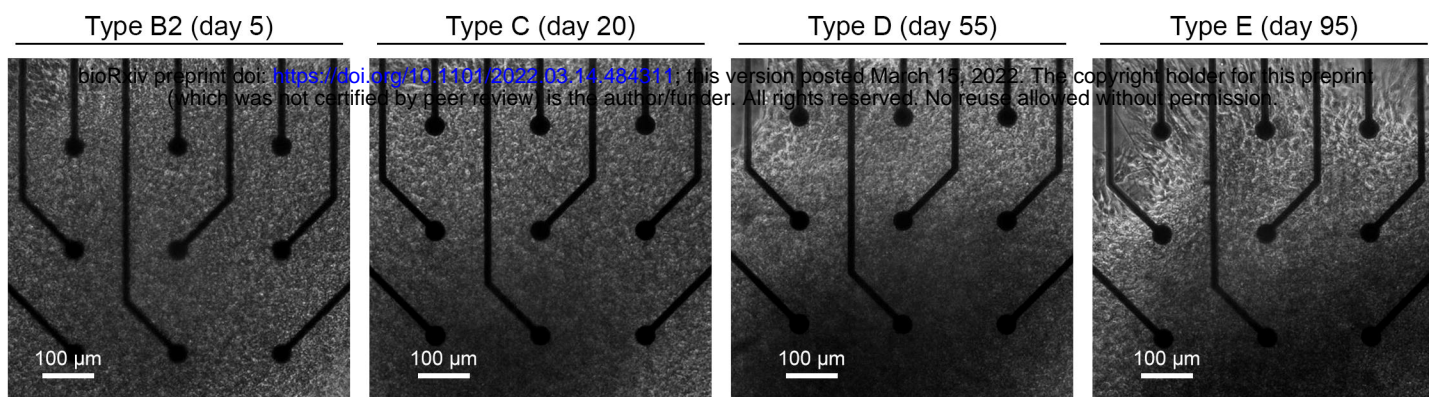

B

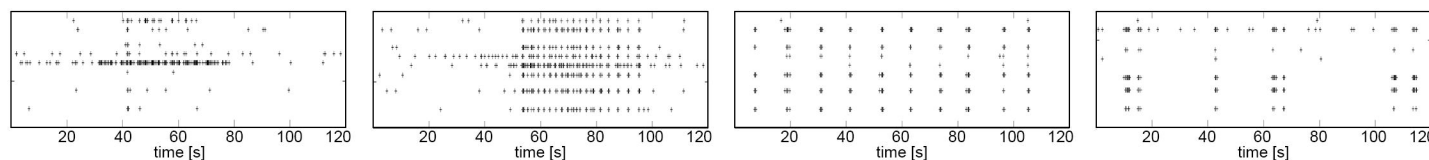

C

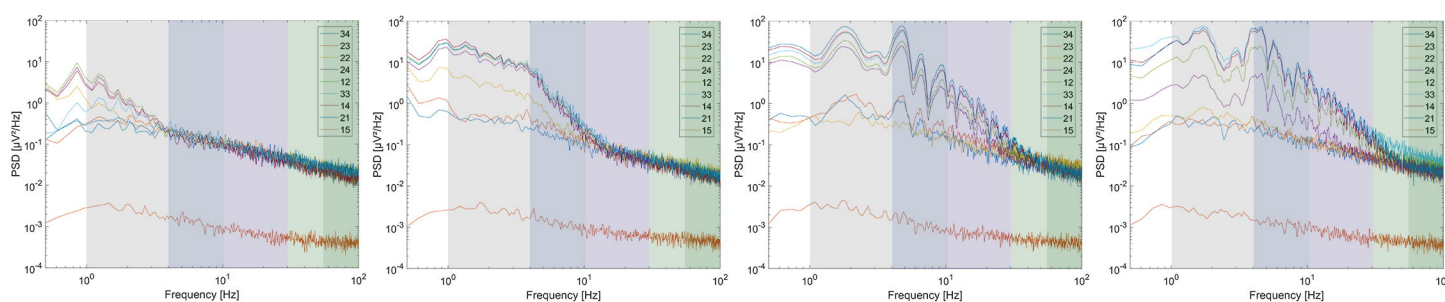

D

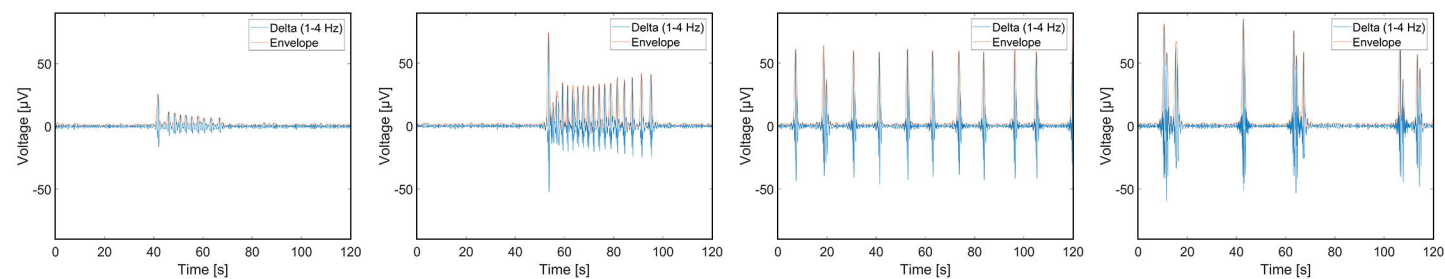

E

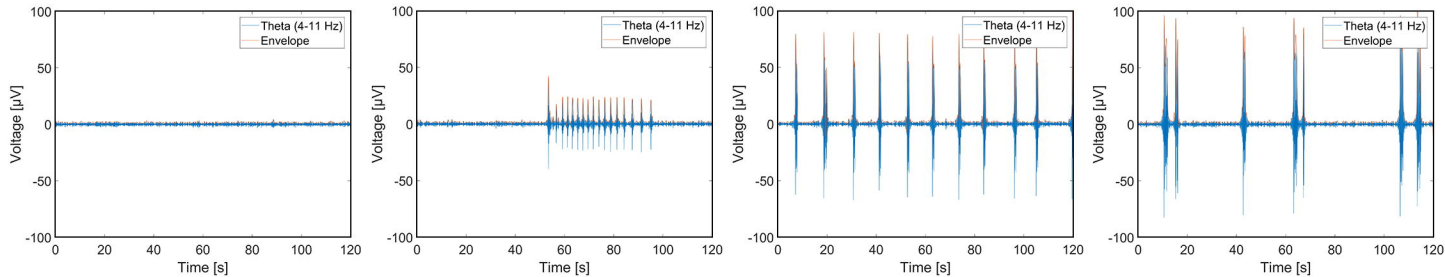

F

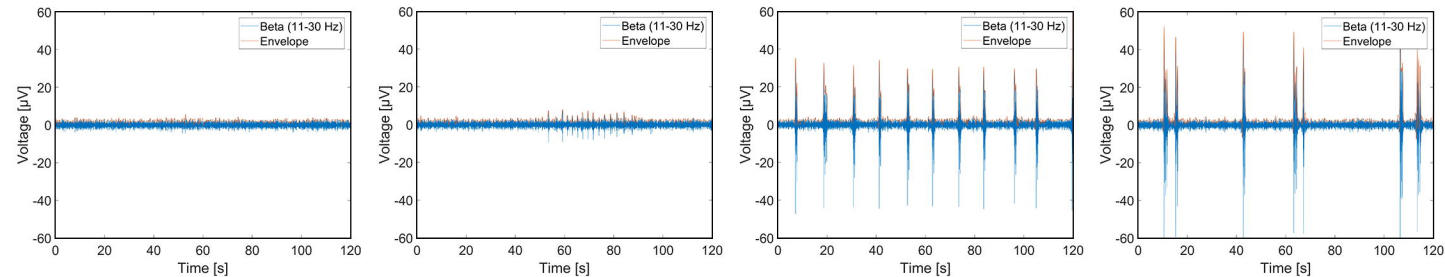

G

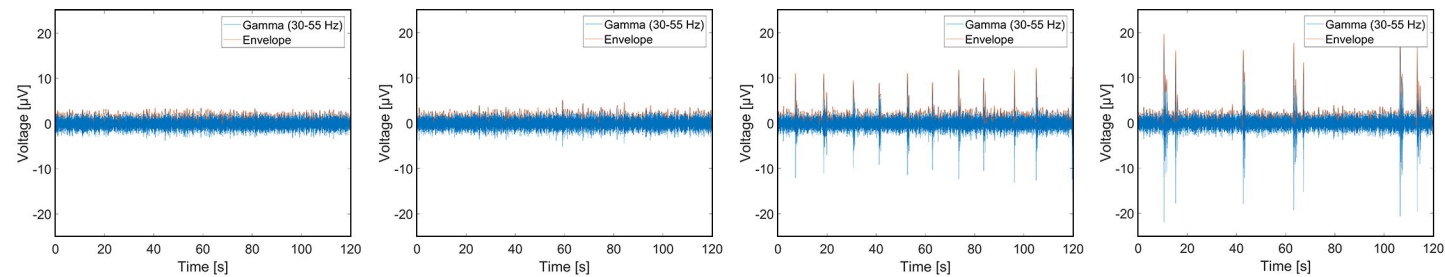

**A**

Type B2 (day 5)

Type C (day 20)

Type D (day 55)

Type E (day 95)

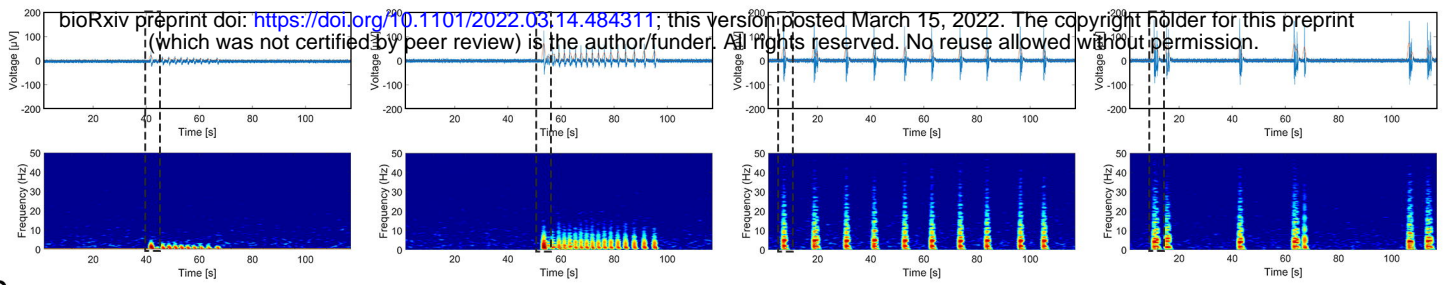**B**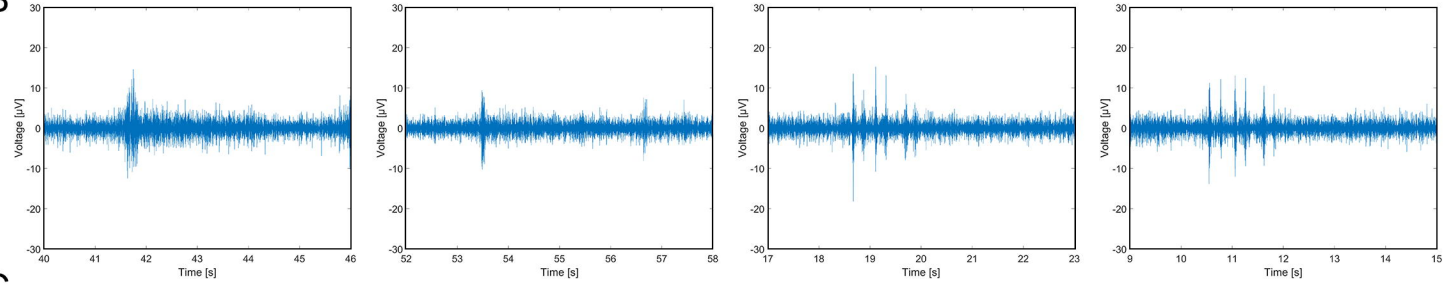**C**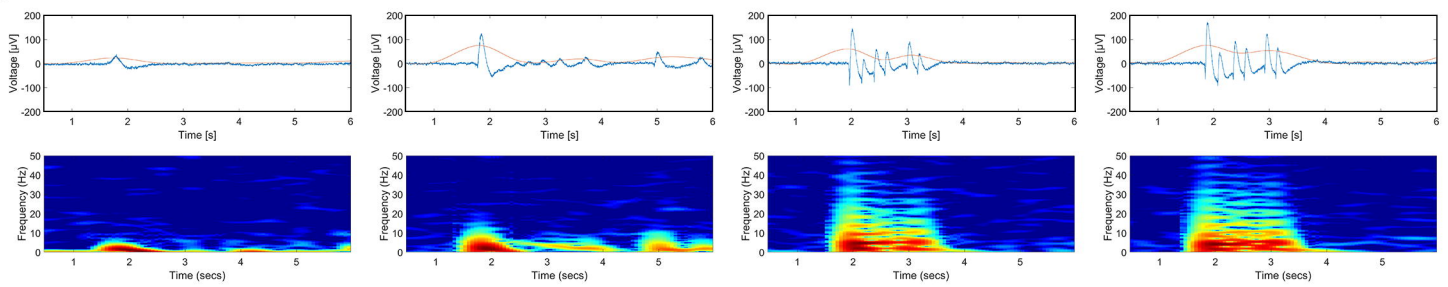



# Functional developmental stages

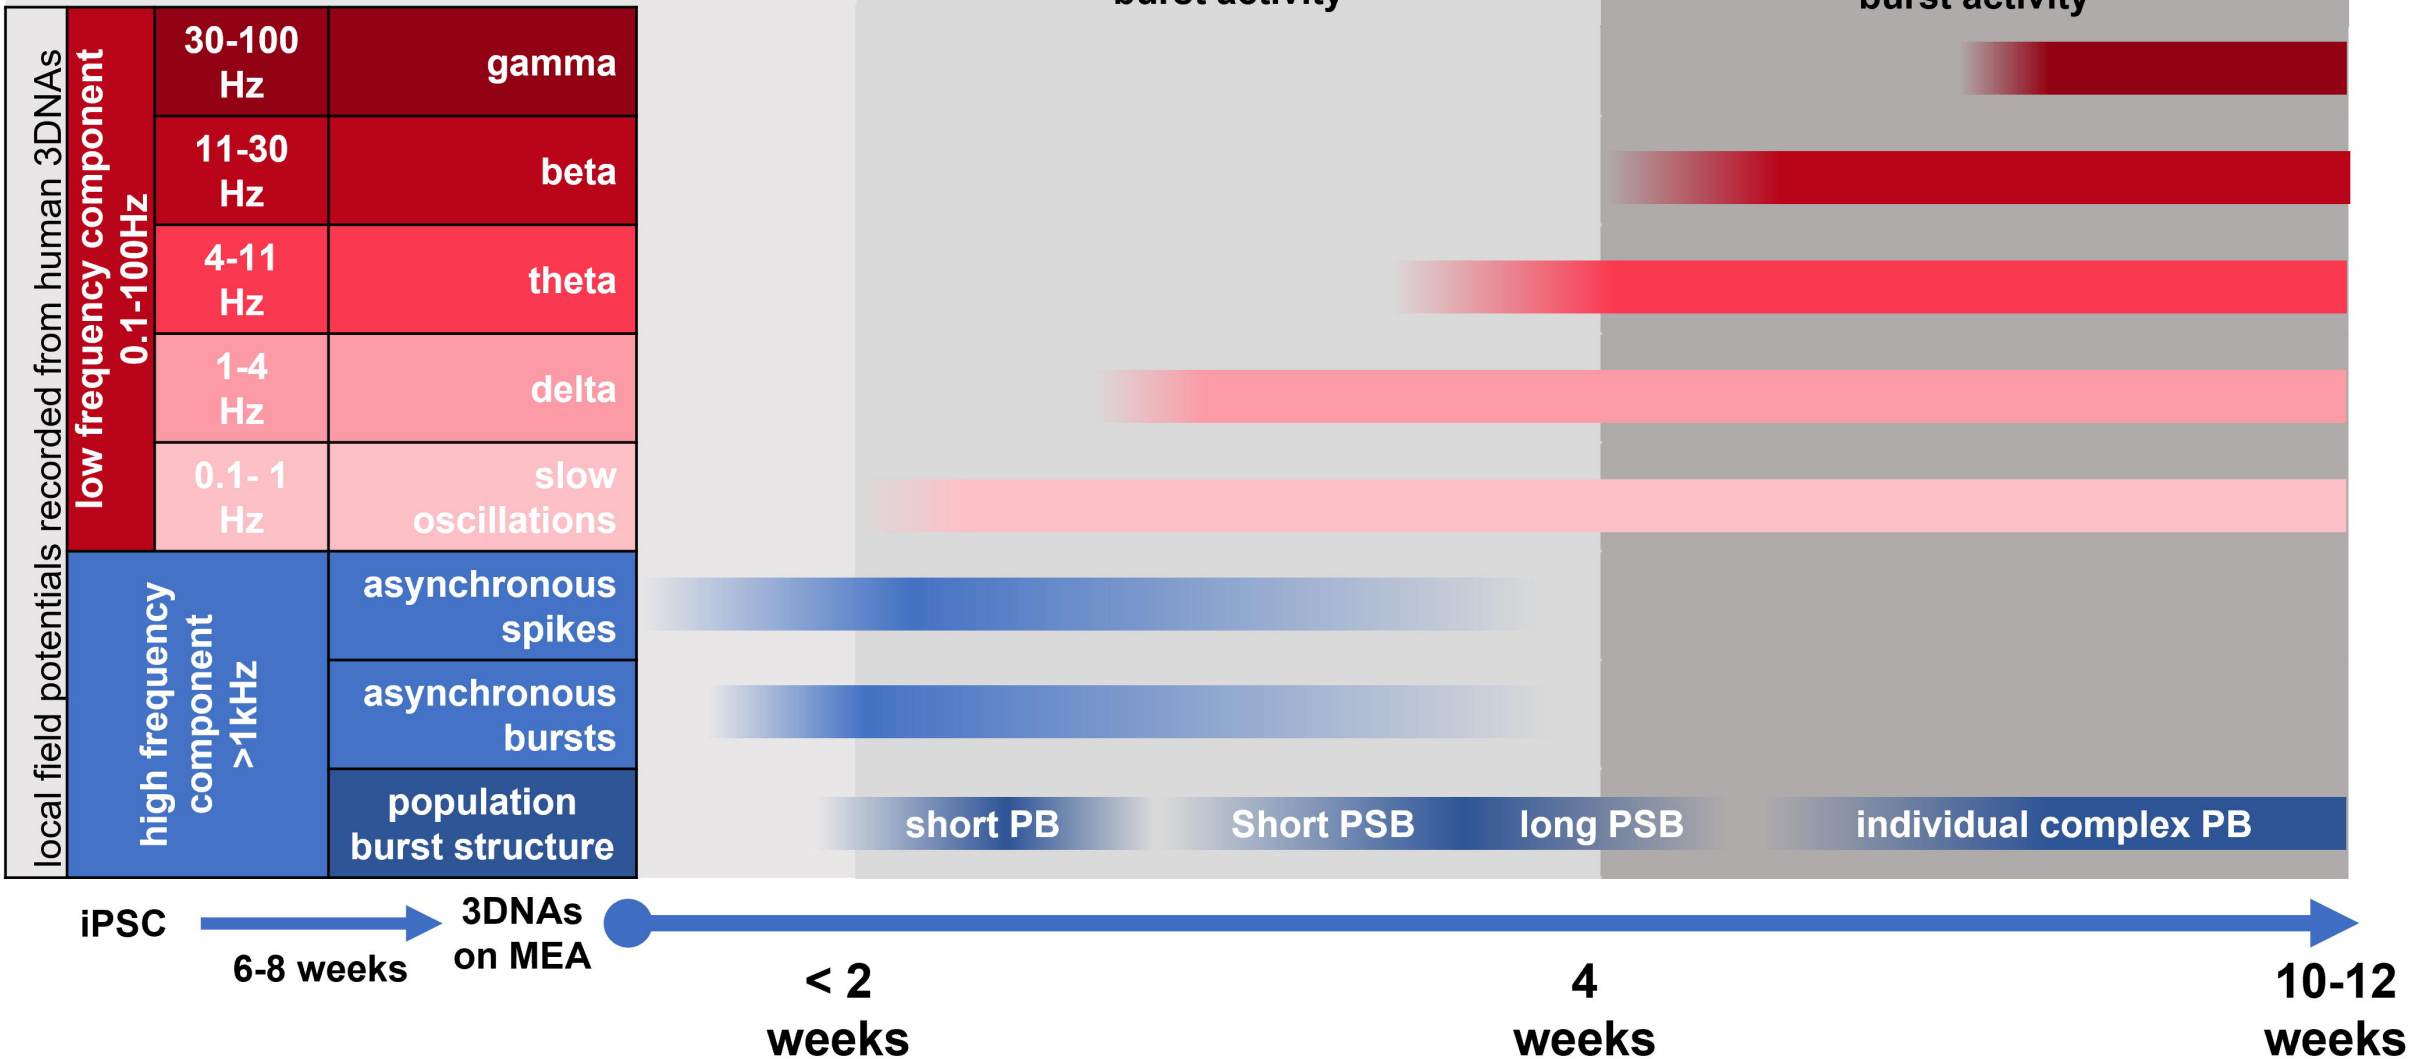

Time after plating of human iPSC-3D neural aggregates on MEA
